# Supplementary material
Source: PubMed Central journal article supplement (PMC3202998)
Supplement: supp_86.11.1075_Arruda_OlsonSupportingOnlineMaterial.pdf [file supp_86.11.1075_Arruda_OlsonSupportingOnlineMaterial.pdf]

## Supporting Online Material

Arruda-Olson AM, Roger VL, Chai HS, de Andrade M, Fridley BL, Cunningham JM, Gabriel SE, Bielinski SJ. Association of *TNFSF8* polymorphisms with peripheral neutrophil count. *Mayo Clin Proc.* 2011;86(11):1075-1081.

**TABLE S1.** Candidate Genes

**TABLE S2.** Association Between Inflammation Genotype and Neutrophil Count

This supplementary material has been peer reviewed and approved by the authors.

TABLE S1. **Candidate Genes**

| Gene symbol                         | Gene name                                                                                                 | Location      | NCBI ID |
|-------------------------------------|-----------------------------------------------------------------------------------------------------------|---------------|---------|
| <b>Tumor necrosis factor family</b> |                                                                                                           |               |         |
| <i>TNF</i>                          | tumor necrosis factor                                                                                     | 6p21.3        | 7124    |
| <i>LTA</i>                          | lymphotoxin alpha (TNF superfamily, member 1)                                                             | 6p21.3        | 4049    |
| <i>LTB</i>                          | lymphotoxin beta (TNF superfamily, member 3)                                                              | 6p21.3        | 4050    |
| <i>TNFSF4</i>                       | tumor necrosis factor (ligand) superfamily, member 4                                                      | 1q25          | 7292    |
| <i>CD40LG</i>                       | CD40 ligand                                                                                               | Xq26          | 959     |
| <i>FASLG</i>                        | Fas ligand (TNF superfamily, member 6)                                                                    | 1q23          | 356     |
| <i>CD70</i>                         | CD70 molecule                                                                                             | 19p13         | 970     |
| <i>TNFSF8</i>                       | tumor necrosis factor (ligand) superfamily, member 8                                                      | 9q33          | 944     |
| <i>TNFSF9</i>                       | tumor necrosis factor (ligand) superfamily, member 9                                                      | 19p13.3       | 8744    |
| <i>TNFSF10</i>                      | tumor necrosis factor superfamily, member 10                                                              | 3q26          | 8743    |
| <i>TNFSF11</i>                      | tumor necrosis factor (ligand) superfamily, member 11                                                     | 13q14         | 8600    |
| <i>TNFSF12</i>                      | tumor necrosis factor (ligand) superfamily, member 12                                                     | 17p13         | 8742    |
| <i>TNFSF13</i>                      | tumor necrosis factor (ligand) superfamily, member 13                                                     | 17p13.1       | 8741    |
| <i>TNFSF13B</i>                     | tumor necrosis factor (ligand) superfamily, member 13b                                                    | 13q32-34      | 10673   |
| <i>TNFSF14</i>                      | tumor necrosis factor (ligand) superfamily, member 14                                                     | 19p13.3       | 8740    |
| <i>TNFSF15</i>                      | VEG1; tumor necrosis factor (ligand) superfamily, member 15                                               | 9q32          | 9966    |
| <i>TNFSF18</i>                      | tumor necrosis factor (ligand) superfamily, member 18                                                     | 1q23          | 8995    |
| <i>EDA</i>                          | ectodysplasin-A                                                                                           | Xq12-q13.1    | 1896    |
| <b>Interleukin-1 family</b>         |                                                                                                           |               |         |
| <i>IL1A</i>                         | interleukin 1, alpha                                                                                      | 2q14          | 3552    |
| <i>IL1B</i>                         | interleukin 1, beta                                                                                       | 2q14          | 3553    |
| <i>IL1RN</i>                        | interleukin 1 receptor antagonist                                                                         | 2q14.2        | 3557    |
| <i>IL18</i>                         | interleukin 18 (interferon-gamma-inducing factor)                                                         | 11q22.2-q22.3 | 3606    |
| <i>IL1F5</i>                        | interleukin 1 family, member 5 (delta)                                                                    | 2q14          | 26525   |
| <i>IL1F6</i>                        | interleukin 1 family, member 6 (epsilon)                                                                  | 2q12-q14.1    | 27179   |
| <i>IL1F7</i>                        | interleukin 1 family, member 7 (zeta)                                                                     | 2q12-q14.1    | 27178   |
| <i>IL1F8</i>                        | interleukin 1 family, member 8 (eta)                                                                      | 2q12-q14.1    | 27177   |
| <i>IL1F9</i>                        | interleukin 1 family, member 9                                                                            | 2q12-q21      | 56300   |
| <i>IL1F10</i>                       | interleukin 1 family, member 10 (theta)                                                                   | 2q13          | 84639   |
| <b>Interleukin-6 family</b>         |                                                                                                           |               |         |
| <i>IL6</i>                          | interleukin 6 (interferon, beta 2)                                                                        | 7p21          | 3569    |
| <i>IL11</i>                         | (natural killer cell stimulatory factor 1, cytotoxic lymphocyte maturation factor 1, p35)                 | 19q13.3-q13.4 | 3589    |
| <i>IL12A</i>                        | interleukin 12A (natural killer cell stimulatory factor 1, cytotoxic lymphocyte maturation factor 1, p35) | 3p12-q13.2    | 3592    |
| <i>IL12B</i>                        | interleukin 12B (natural killer cell stimulatory factor 2, cytotoxic lymphocyte maturation factor 2, p40) | 5q31.1-q33.1  | 3593    |
| <i>IL23A</i>                        | interleukin 23, alpha subunit p19                                                                         | 12q13.2       | 51561   |
| <i>OSM</i>                          | oncostatin M                                                                                              | 22q12.2       | 5008    |
| <i>LIF</i>                          | leukemia inhibitory factor (cholinergic differentiation factor)                                           | 22q12.2       | 3976    |
| <i>CNTF</i>                         | ciliary neurotrophic factor                                                                               | 11q12.2       | 1270    |
| <i>CLCF1</i>                        | cardiotrophin-like cytokine factor 1                                                                      | 11q13.3       | 23529   |
| <i>CTF1</i>                         | cardiotrophin 1                                                                                           | 16p11.2-p11.1 | 1489    |
| <i>CSF3</i>                         | colony stimulating factor 3 (granulocyte)                                                                 | 17q11.2-q12   | 1440    |
| <i>LEP</i>                          | leptin                                                                                                    | 7q31.3        | 3952    |

NCBI ID = National Center for Biotechnology Information identification number.

TABLE S2. Association Between Inflammation Genotype and Neutrophil Count

| gene name, <sup>a</sup> SNP  | Mean $\pm$ SD neutrophil count, $\times 10^9/L$ (No. of samples) |                         |                         |                         | P value  | P value (multivariate) <sup>b</sup> |
|------------------------------|------------------------------------------------------------------|-------------------------|-------------------------|-------------------------|----------|-------------------------------------|
|                              | 0                                                                | 1                       | 2                       | Male.X.minor.allele     |          |                                     |
| <b>TNF FAMILY</b>            |                                                                  |                         |                         |                         |          |                                     |
| <b>TNF; LTA; LTB</b>         |                                                                  |                         |                         |                         |          |                                     |
| rs3093662 (AA, AG, GG)       | 8.313 $\pm$ 5.776 (730)                                          | 7.595 $\pm$ 4.245 (93)  | 6.657 $\pm$ 3.402 (6)   | -                       | 0.138    | 0.102                               |
| rs1799964 (AA, AG, GG)       | 8.168 $\pm$ 4.906 (505)                                          | 8.048 $\pm$ 5.914 (287) | 10.29 $\pm$ 10.26 (37)  | -                       | 0.1088   | 0.07038                             |
| rs1800630 (CC, CA, AA)       | 8.07 $\pm$ 4.779 (570)                                           | 8.354 $\pm$ 6.412 (239) | 10.93 $\pm$ 12.87 (20)  | -                       | 0.3346   | 0.1213                              |
| rs2229094 (AA, AG, GG)       | 8.199 $\pm$ 4.901 (440)                                          | 7.954 $\pm$ 5.819 (331) | 9.906 $\pm$ 8.568 (58)  | -                       | 0.01131  | 0.01271                             |
| rs2844482 (G:A) (GG, GA, AA) | 8.07 $\pm$ 4.776 (569)                                           | 8.352 $\pm$ 6.412 (240) | 10.93 $\pm$ 12.87 (20)  | -                       | 0.3416   | 0.1253                              |
| rs909253 (AA, AG, GG)        | 8.506 $\pm$ 5.916 (340)                                          | 8.073 $\pm$ 5.639 (392) | 7.818 $\pm$ 4.261 (97)  | -                       | 0.3021   | 0.09057                             |
| rs915654 (TT, TA, AA)        | 8.292 $\pm$ 5.085 (344)                                          | 8.209 $\pm$ 5.765 (384) | 8.024 $\pm$ 6.697 (101) | -                       | 0.3973   | 0.4905                              |
| rs2844484 (GG, GA, AA)       | 8.091 $\pm$ 6.502 (315)                                          | 8.353 $\pm$ 4.807 (403) | 8.112 $\pm$ 5.653 (111) | -                       | 0.1017   | 0.1088                              |
| <b>TNF; LTB</b>              |                                                                  |                         |                         |                         |          |                                     |
| rs9267502 (GG, GA, AA)       | 8.307 $\pm$ 5.812 (715)                                          | 7.739 $\pm$ 4.177 (108) | 6.657 $\pm$ 3.402 (6)   | -                       | 0.2745   | 0.1765                              |
| <b>TNFSF4</b>                |                                                                  |                         |                         |                         |          |                                     |
| rs10127728 (CC, CA, AA)      | 8.156 $\pm$ 5.136 (644)                                          | 8.529 $\pm$ 7.202 (175) | 7.004 $\pm$ 2.74 (10)   | -                       | 0.6887   | 0.5573                              |
| rs10489270 (GG, GA, AA)      | 8.233 $\pm$ 5.78 (628)                                           | 8.181 $\pm$ 5.117 (195) | 8.218 $\pm$ 3.625 (6)   | -                       | 0.6269   | 0.469                               |
| rs10912560 (AA, AG, GG)      | 8.373 $\pm$ 5.931 (477)                                          | 7.994 $\pm$ 4.967 (297) | 8.125 $\pm$ 6.113 (55)  | -                       | 0.2991   | 0.2804                              |
| rs11811788 (GG, GC, CC)      | 8.274 $\pm$ 5.051 (448)                                          | 8.194 $\pm$ 6.282 (322) | 7.962 $\pm$ 5.889 (59)  | -                       | 0.2468   | 0.274                               |
| rs11811856 (CC, CG, GG)      | 8.324 $\pm$ 5.152 (424)                                          | 8.11 $\pm$ 6.07 (335)   | 8.126 $\pm$ 6.075 (70)  | -                       | 0.2695   | 0.2919                              |
| rs1234313 (GG, GA, AA)       | 8.387 $\pm$ 5.922 (374)                                          | 7.91 $\pm$ 5.296 (367)  | 8.819 $\pm$ 5.567 (87)  | -                       | 0.07961  | 0.154                               |
| rs1234314 (CC, CG, GG)       | 8.033 $\pm$ 4.856 (283)                                          | 8.164 $\pm$ 6.32 (394)  | 8.718 $\pm$ 4.949 (152) | -                       | 0.04941  | 0.04029                             |
| rs1234315 (GG, GA, AA)       | 8.235 $\pm$ 5.102 (239)                                          | 7.968 $\pm$ 5.339 (406) | 8.761 $\pm$ 6.723 (184) | -                       | 0.08321  | 0.04991                             |
| rs17300347 (TT, TA, AA)      | 8.382 $\pm$ 5.849 (525)                                          | 7.92 $\pm$ 4.971 (268)  | 8.102 $\pm$ 6.61 (36)   | -                       | 0.1868   | 0.1458                              |
| rs3850641 (AA, AG, GG)       | 8.097 $\pm$ 5.725 (561)                                          | 8.424 $\pm$ 5.307 (244) | 9.059 $\pm$ 6.1 (24)    | -                       | 0.1131   | 0.08862                             |
| rs3861950 (AA, AG, GG)       | 8.29 $\pm$ 5.144 (382)                                           | 8.201 $\pm$ 6.071 (353) | 8.016 $\pm$ 5.708 (94)  | -                       | 0.2892   | 0.2785                              |
| rs3861953 (GG, GA, AA)       | 8.126 $\pm$ 5.627 (685)                                          | 8.608 $\pm$ 5.46 (136)  | 9.77 $\pm$ 7.211 (8)    | -                       | 0.1297   | 0.07583                             |
| rs6661173 (GG, GA, AA)       | 8.169 $\pm$ 5.136 (703)                                          | 8.564 $\pm$ 7.942 (120) | 7.38 $\pm$ 3.133 (6)    | -                       | 0.9051   | 0.6576                              |
| <b>CD40LG</b>                |                                                                  |                         |                         |                         |          |                                     |
| rs3092933 (GG, GA, AA)       | 8.257 $\pm$ 5.752 (738)                                          | 8.887 $\pm$ 4.616 (59)  | -6.178 $\pm$ 3.21 (31)  | -                       | 0.006477 | 0.03093                             |
| rs3092936 (AA, AG, GG)       | 8.255 $\pm$ 5.775 (695)                                          | 7.716 $\pm$ 3.88 (72)   | 12.36 $\pm$ 12.93 (5)   | 8.082 $\pm$ 4.441 (57)  | 0.2703   | 0.09083                             |
| rs3092923 (AA, AG, GG)       | 8.251 $\pm$ 5.76 (735)                                           | 8.748 $\pm$ 4.601 (60)  | -6.637 $\pm$ 3.426 (34) | -                       | 0.03169  | 0.1221                              |
| rs3092946 (TT, TA, AA)       | 8.26 $\pm$ 5.763 (686)                                           | 7.908 $\pm$ 4.293 (76)  | 12.36 $\pm$ 12.93 (5)   | 7.838 $\pm$ 4.404 (62)  | 0.2034   | 0.1496                              |
| rs3092948 (GG, GC, CC)       | 8.363 $\pm$ 5.979 (604)                                          | 7.77 $\pm$ 3.809 (117)  | 11.35 $\pm$ 8.55 (15)   | 7.361 $\pm$ 4.144 (93)  | 0.009163 | 0.05109                             |
| rs3092949 (GG, GA, AA)       | 8.127 $\pm$ 5.529 (485)                                          | 8.574 $\pm$ 6.129 (172) | 8.795 $\pm$ 6.991 (49)  | 7.869 $\pm$ 4.499 (123) | 0.1402   | 0.3723                              |
| rs3092952 (AA, AG, GG)       | 8.346 $\pm$ 5.97 (603)                                           | 7.858 $\pm$ 3.911 (118) | 11.35 $\pm$ 8.55 (15)   | 7.361 $\pm$ 4.144 (93)  | 0.00939  | 0.06276                             |
| rs5930973 (GG, GA, AA)       | 8.258 $\pm$ 5.745 (748)                                          | 7.915 $\pm$ 4.253 (56)  | -7.781 $\pm$ 4.225 (25) | -                       | 0.7603   | 0.4571                              |
| <b>FASLG</b>                 |                                                                  |                         |                         |                         |          |                                     |
| rs10458360 (CC, CG, GG)      | 8.259 $\pm$ 6.369 (250)                                          | 8.263 $\pm$ 5.199 (430) | 8.034 $\pm$ 5.446 (149) | -                       | 0.1987   | 0.1725                              |
| rs12135884 (AA, AG, GG)      | 8.111 $\pm$ 5.897 (383)                                          | 8.399 $\pm$ 5.172 (378) | 7.85 $\pm$ 6.346 (68)   | -                       | 0.03282  | 0.03693                             |
| rs17370527 (TT, TA, AA)      | 8.277 $\pm$ 5.831 (631)                                          | 8.136 $\pm$ 4.95 (183)  | 6.903 $\pm$ 3.575 (15)  | -                       | 0.3415   | 0.332                               |
| rs2639614 (GG, GA, AA)       | 8.5 $\pm$ 6.091 (594)                                            | 7.447 $\pm$ 3.599 (208) | 8.027 $\pm$ 6.9 (27)    | -                       | 0.02091  | 0.02462                             |
| rs2639654 (CC, CA, AA)       | 8.21 $\pm$ 5.286 (672)                                           | 8.191 $\pm$ 6.601 (151) | 10.17 $\pm$ 12.53 (6)   | -                       | 0.7045   | 0.4177                              |
| rs2859242 (GG, GA, AA)       | 8.416 $\pm$ 5.818 (250)                                          | 8.202 $\pm$ 4.961 (411) | 7.978 $\pm$ 6.725 (168) | -                       | 0.2807   | 0.3942                              |
| rs5030772 (AA, AG, GG)       | 8.193 $\pm$ 5.473 (597)                                          | 8.208 $\pm$ 5.803 (214) | 9.293 $\pm$ 7.828 (18)  | -                       | 0.5862   | 0.4126                              |
| rs6700734 (AA, AG, GG)       | 8.191 $\pm$ 5.729 (450)                                          | 8.412 $\pm$ 5.45 (334)  | 7.104 $\pm$ 5.626 (45)  | -                       | 0.008741 | 0.006107                            |
| rs859663 (CC, CA, AA)        | 8.21 $\pm$ 5.286 (672)                                           | 8.191 $\pm$ 6.601 (151) | 10.17 $\pm$ 12.53 (6)   | -                       | 0.7045   | 0.4177                              |
| rs929087 (GG, GA, AA)        | 7.99 $\pm$ 5.246 (234)                                           | 8.449 $\pm$ 6.096 (426) | 7.966 $\pm$ 4.78 (169)  | -                       | 0.0858   | 0.05259                             |
| <b>CD70</b>                  |                                                                  |                         |                         |                         |          |                                     |
| rs168259 (GG, GA, AA)        | 8.306 $\pm$ 5.921 (645)                                          | 7.919 $\pm$ 4.404 (171) | 7.843 $\pm$ 4.197 (12)  | -                       | 0.9126   | 0.81                                |
| rs344591 (GG, GA, AA)        | 7.54 $\pm$ 4.603 (238)                                           | 8.545 $\pm$ 6.468 (417) | 8.374 $\pm$ 4.505 (174) | -                       | 0.01737  | 0.03538                             |
| rs344595 (AA, AG, GG)        | 8.295 $\pm$ 5.535 (653)                                          | 8.053 $\pm$ 6.004 (167) | 5.957 $\pm$ 3.087 (9)   | -                       | 0.03301  | 0.01827                             |
| rs344596 (AA, AG, GG)        | 8.252 $\pm$ 5.774 (709)                                          | 7.996 $\pm$ 4.551 (114) | 8.797 $\pm$ 5.284 (6)   | -                       | 0.7619   | 0.3941                              |
| rs2910434 (AA, AC, CC)       | 8.178 $\pm$ 5.432 (652)                                          | 8.44 $\pm$ 6.241 (165)  | 7.532 $\pm$ 6.584 (12)  | -                       | 0.1962   | 0.1778                              |
| rs16994592 (AA, AG, GG)      | 8.224 $\pm$ 5.472 (670)                                          | 8.208 $\pm$ 6.13 (150)  | 8.224 $\pm$ 7.567 (9)   | -                       | 0.2806   | 0.2062                              |
| rs17703895 (CC, CA, AA)      | 8.172 $\pm$ 5.209 (408)                                          | 8.509 $\pm$ 6.278 (357) | 6.924 $\pm$ 3.73 (64)   | -                       | 0.02161  | 0.05807                             |
| rs1808398 (AA, AG, GG)       | 8.3 $\pm$ 5.576 (448)                                            | 8.224 $\pm$ 5.846 (325) | 7.568 $\pm$ 4.457 (56)  | -                       | 0.2589   | 0.3373                              |
| rs344586 (CC, CG, GG)        | 8.282 $\pm$ 5.515 (518)                                          | 8.202 $\pm$ 5.892 (276) | 7.47 $\pm$ 4.845 (35)   | -                       | 0.1399   | 0.1882                              |
| rs344589 (AA, AG, GG)        | 8.221 $\pm$ 5.796 (612)                                          | 8.188 $\pm$ 5.143 (200) | 8.588 $\pm$ 4.314 (17)  | -                       | 0.5156   | 0.2885                              |
| <b>TNFSF9</b>                |                                                                  |                         |                         |                         |          |                                     |
| rs348389 (GG, GA, AA)        | 8.166 $\pm$ 4.68 (338)                                           | 8.428 $\pm$ 6.482 (379) | 7.712 $\pm$ 5.046 (108) | -                       | 0.05847  | 0.07534                             |
| rs348390 (AA, AG, GG)        | 8.244 $\pm$ 5.838 (695)                                          | 8.032 $\pm$ 4.325 (128) | 9.602 $\pm$ 3.076 (6)   | -                       | 0.2221   | 0.3043                              |

**TNFSF10**

|                         |                   |                   |                   |   |        |         |
|-------------------------|-------------------|-------------------|-------------------|---|--------|---------|
| rs11706116 (AA, AC, CC) | 8.182±5.192 (494) | 8.389±6.576 (286) | 7.635±3.05 (49)   | - | 0.5969 | 0.6743  |
| rs1823227 (AA, AC, CC)  | 7.994±4.778 (456) | 8.612±6.814 (313) | 7.905±4.393 (60)  | - | 0.3357 | 0.3564  |
| rs2270418 (AA, AC, CC)  | 8.231±4.912 (549) | 8.132±6.989 (247) | 8.715±5.134 (33)  | - | 0.1567 | 0.224   |
| rs231983 (AA, AC, CC)   | 8.434±5.279 (313) | 8.149±6.08 (366)  | 7.952±5.1 (150)   | - | 0.1114 | 0.04914 |
| rs231985 (TT, TA, AA)   | 8.243±5.927 (621) | 8.184±4.64 (196)  | 7.477±3.661 (7)   | - | 0.4926 | 0.342   |
| rs231987 (CC, CG, GG)   | 8.238±5.917 (624) | 8.192±4.613 (198) | 7.477±3.661 (7)   | - | 0.4482 | 0.3174  |
| rs233998 (GG, GA, AA)   | 8.429±6.096 (547) | 7.866±4.583 (246) | 7.482±4.059 (36)  | - | 0.1469 | 0.02219 |
| rs3136581 (GG, GA, AA)  | 8.165±5.814 (521) | 8.304±5.222 (268) | 8.392±5.61 (40)   | - | 0.5057 | 0.3152  |
| rs3136594 (GG, GA, AA)  | 8.26±5.284 (452)  | 8.32±6.424 (314)  | 7.447±2.953 (63)  | - | 0.8089 | 0.7808  |
| rs3136609 (GG, GA, AA)  | 8.2±5.729 (719)   | 8.364±4.881 (106) | 8.2±2.718 (4)     | - | 0.3761 | 0.2357  |
| rs3181139 (CC, CA, AA)  | 8.344±5.731 (495) | 8.041±5.572 (287) | 8.019±4.583 (47)  | - | 0.1772 | 0.438   |
| rs3774315 (AA, AG, GG)  | 8.238±5.221 (453) | 8.324±6.433 (308) | 7.641±3.94 (68)   | - | 0.8215 | 0.7961  |
| rs4894559 (GG, GA, AA)  | 8.339±5.517 (479) | 8.15±5.965 (290)  | 7.615±4.565 (60)  | - | 0.1867 | 0.0326  |
| rs6783667 (AA, AG, GG)  | 8.379±6.383 (408) | 8.168±4.89 (332)  | 7.694±4.206 (89)  | - | 0.4639 | 0.1837  |
| rs9854603 (AA, AG, GG)  | 8.274±6.026 (581) | 8.035±4.241 (222) | 8.617±6.455 (26)  | - | 0.6221 | 0.6743  |
| rs9859259 (CC, CA, AA)  | 7.74±3.653 (246)  | 8.517±6.641 (401) | 8.192±5.304 (181) | - | 0.8593 | 0.4108  |
| rs9859413 (GG, GA, AA)  | 7.94±4.887 (506)  | 8.547±6.382 (271) | 9.183±7.612 (51)  | - | 0.1758 | 0.1185  |

**TNFSF11**

|                         |                   |                   |                   |   |         |         |
|-------------------------|-------------------|-------------------|-------------------|---|---------|---------|
| rs12585229 (GG, GA, AA) | 8.215±5.666 (672) | 8.138±5.021 (148) | 10.02±10.07 (9)   | - | 0.4402  | 0.3821  |
| rs1325793 (GG, GA, AA)  | 8.177±5.728 (742) | 8.594±4.53 (87)   | -                 | - | 0.1742  | 0.1636  |
| rs17536328 (GG, GA, AA) | 8.479±6.405 (281) | 7.945±5.247 (390) | 8.467±4.95 (157)  | - | 0.08903 | 0.1126  |
| rs17596972 (GG, GA, AA) | 8.262±5.701 (660) | 7.94±4.915 (159)  | 9.994±9.492 (10)  | - | 0.1578  | 0.1168  |
| rs2148072 (GG, GA, AA)  | 8.135±5.033 (315) | 8.066±6.055 (392) | 8.939±5.551 (122) | - | 0.04036 | 0.06988 |
| rs346574 (GG, GA, AA)   | 8.252±5.258 (722) | 8.011±7.618 (107) | -                 | - | 0.2542  | 0.3409  |
| rs346588 (AA, AG, GG)   | 8.32±5.262 (571)  | 7.909±6.261 (232) | 8.827±6.971 (26)  | - | 0.03287 | 0.02299 |
| rs346604 (CC, CA, AA)   | 8.288±5.288 (716) | 7.905±7.473 (109) | 4.883±1.187 (4)   | - | 0.04079 | 0.08332 |
| rs3742257 (AA, AG, GG)  | 8.024±4.6 (217)   | 8.153±6.184 (411) | 8.572±5.387 (201) | - | 0.1927  | 0.3608  |
| rs633137 (AA, AG, GG)   | 8.27±5.277 (723)  | 7.886±7.542 (106) | -                 | - | 0.1761  | 0.2406  |
| rs7990075 (AA, AG, GG)  | 8.342±5.195 (289) | 7.956±5.279 (421) | 8.865±7.44 (119)  | - | 0.04698 | 0.09445 |
| rs931273 (GG, GA, AA)   | 8.191±5.701 (626) | 8.074±4.883 (187) | 11.3±9.236 (15)   | - | 0.0562  | 0.03758 |
| rs9525646 (CC, CG, GG)  | 8.202±5.258 (249) | 8.095±5.388 (412) | 8.557±6.602 (168) | - | 0.192   | 0.2623  |
| rs9533172 (CC, CG, GG)  | 8.296±5.294 (489) | 8.017±6.076 (290) | 8.448±5.828 (48)  | - | 0.0789  | 0.06017 |
| rs9533173 (GG, GA, AA)  | 8.28±5.951 (286)  | 8.148±5.624 (386) | 8.293±4.947 (157) | - | 0.3276  | 0.3387  |
| rs9562414 (AA, AG, GG)  | 8.326±5.333 (698) | 7.756±7.032 (126) | 5.316±1.659 (5)   | - | 0.0365  | 0.1192  |

**TNFSF12;TNFSF13**

|                         |                   |                   |                   |   |          |          |
|-------------------------|-------------------|-------------------|-------------------|---|----------|----------|
| rs4968200 (GG, GC, CC)  | 8.454±6.014 (632) | 7.272±3.851 (180) | 9.606±4.884 (17)  | - | 0.005165 | 0.004466 |
| rs12940684 (AA, AG, GG) | 8.001±5.109 (405) | 8.318±5.238 (347) | 8.951±8.938 (76)  | - | 0.3181   | 0.3828   |
| rs3803796 (GG, GC, CC)  | 8.492±6.001 (673) | 7.005±3.25 (148)  | 7.895±3.052 (8)   | - | 0.003632 | 0.002752 |
| rs9899183 (AA, AG, GG)  | 8.113±5.204 (443) | 8.231±5.113 (324) | 8.971±9.774 (60)  | - | 0.7623   | 0.8159   |
| rs12937543 (AA, AT, TT) | 7.786±5.919 (248) | 8.541±5.639 (419) | 8.062±5.032 (161) | - | 0.03999  | 0.02835  |
| rs4511593 (AA, AG, GG)  | 7.906±5.133 (350) | 8.404±5.267 (379) | 8.637±8.046 (99)  | - | 0.1415   | 0.1538   |
| rs4968212 (GG, GA, AA)  | 8.028±5.161 (416) | 8.239±5.064 (348) | 9.357±9.715 (65)  | - | 0.2709   | 0.2919   |
| rs8068222 (CC, CA, AA)  | 8.048±5.813 (300) | 8.44±5.68 (408)   | 7.908±4.863 (120) | - | 0.2203   | 0.3551   |

**TNFSF13B**

|                         |                   |                   |                   |   |         |         |
|-------------------------|-------------------|-------------------|-------------------|---|---------|---------|
| rs1041569 (TT, TA, AA)  | 8.031±5.364 (520) | 8.541±6.293 (222) | 8.613±5.274 (85)  | - | 0.3011  | 0.4871  |
| rs10508198 (GG, GC, CC) | 8.304±5.789 (389) | 8.16±5.556 (355)  | 8.093±5.066 (85)  | - | 0.5501  | 0.343   |
| rs1224141 (AA, AC, CC)  | 8.219±5.842 (489) | 8.105±5.096 (301) | 9.128±6.511 (39)  | - | 0.2818  | 0.1985  |
| rs1224147 (AA, AG, GG)  | 8.331±5.742 (473) | 8.061±5.27 (303)  | 8.151±6.391 (53)  | - | 0.5758  | 0.6345  |
| rs12428930 (AA, AC, CC) | 8.357±6.095 (520) | 8.044±4.786 (273) | 7.589±3.946 (36)  | - | 0.6721  | 0.3225  |
| rs16972207 (GG, GC, CC) | 8.214±5.455 (555) | 8.292±6.059 (256) | 7.42±3.682 (18)   | - | 0.2479  | 0.1856  |
| rs16972216 (GG, GA, AA) | 8.225±5.873 (595) | 8.309±4.981 (210) | 7.503±4.161 (23)  | - | 0.5343  | 0.6502  |
| rs17499386 (AA, AG, GG) | 8.126±5.673 (609) | 8.401±5.458 (200) | 9.604±5.427 (19)  | - | 0.1397  | 0.0591  |
| rs4145212 (TT, TA, AA)  | 8.076±5.003 (454) | 8.428±5.508 (312) | 8.298±9.305 (62)  | - | 0.1177  | 0.1837  |
| rs8181791 (AA, AG, GG)  | 8.588±6.1 (381)   | 7.966±5.281 (355) | 7.692±4.64 (93)   | - | 0.06874 | 0.04091 |
| rs9514827 (AA, AG, GG)  | 8.746±6.41 (387)  | 7.713±4.738 (369) | 8.007±4.949 (73)  | - | 0.01618 | 0.017   |
| rs9514828 (GG, GA, AA)  | 8.61±6.277 (222)  | 8.137±5.45 (420)  | 7.957±5.139 (186) | - | 0.1698  | 0.1031  |
| rs9520836 (AA, AG, GG)  | 8.088±4.921 (479) | 8.437±5.699 (295) | 8.22±9.567 (55)   | - | 0.2408  | 0.4337  |

**TNFSF14**

|                         |                   |                   |                  |   |        |        |
|-------------------------|-------------------|-------------------|------------------|---|--------|--------|
| rs12609318 (GG, GA, AA) | 8.099±4.884 (448) | 8.436±6.536 (330) | 7.981±5.214 (50) | - | 0.3796 | 0.5681 |
| rs2279627 (CC, CG, GG)  | 8.105±4.888 (447) | 8.401±6.504 (334) | 8.128±5.345 (47) | - | 0.4805 | 0.6895 |
| rs8106574 (GG, GA, AA)  | 8.18±5.605 (502)  | 8.286±5.617 (282) | 8.369±5.827 (44) | - | 0.4996 | 0.3077 |

**TNFSF15**

|                         |                   |                   |                   |   |         |          |
|-------------------------|-------------------|-------------------|-------------------|---|---------|----------|
| rs10114470 (GG, GA, AA) | 7.914±4.872 (410) | 8.522±6.558 (342) | 8.513±4.643 (77)  | - | 0.08882 | 0.1847   |
| rs10982412 (GG, GA, AA) | 8.411±5.629 (622) | 7.634±5.593 (193) | 7.879±4.916 (14)  | - | 0.01563 | 0.007293 |
| rs1407308 (CC, CA, AA)  | 8.229±5.166 (213) | 8.088±5.597 (415) | 8.487±6.101 (201) | - | 0.2623  | 0.3503   |
| rs4246905 (GG, GA, AA)  | 7.899±4.87 (442)  | 8.629±6.675 (322) | 8.392±4.412 (64)  | - | 0.08398 | 0.2181   |
| rs4263839 (GG, GA, AA)  | 7.868±4.771 (395) | 8.541±6.506 (355) | 8.548±5.121 (79)  | - | 0.1264  | 0.1314   |
| rs4372078 (CC, CA, AA)  | 7.844±4.675 (422) | 8.658±6.76 (343)  | 8.364±4.277 (63)  | - | 0.118   | 0.1531   |
| rs7847158 (AA, AG, GG)  | 8.295±5.442 (440) | 8.06±5.738 (329)  | 8.559±6.21 (60)   | - | 0.3379  | 0.315    |
| rs7853287 (GG, GA, AA)  | 8.436±6.317 (486) | 7.731±4.039 (294) | 9.028±6.182 (49)  | - | 0.2098  | 0.1766   |
| rs7862325 (GG, GA, AA)  | 8.231±5.121 (216) | 8.081±5.602 (415) | 8.502±6.144 (198) | - | 0.2447  | 0.3582   |

**TNFSF18**

|                         |                   |                   |                   |   |         |         |
|-------------------------|-------------------|-------------------|-------------------|---|---------|---------|
| rs16845308 (CC, CA, AA) | 7.986±4.743 (465) | 8.566±6.744 (309) | 8.264±5.418 (55)  | - | 0.4785  | 0.1926  |
| rs2236876 (GG, GA, AA)  | 7.98±4.74 (466)   | 8.556±6.751 (309) | 8.382±5.398 (54)  | - | 0.4117  | 0.1255  |
| rs723858 (TT, TA, AA)   | 7.933±4.627 (526) | 8.777±7.096 (268) | 8.283±6.144 (35)  | - | 0.2798  | 0.1191  |
| rs9286880 (AA, AC, CC)  | 8.429±6.32 (442)  | 7.937±4.64 (325)  | 8.223±4.885 (62)  | - | 0.3066  | 0.1983  |
| rs975074 (AA, AC, CC)   | 7.875±4.614 (221) | 8.675±6.437 (424) | 7.589±4.492 (184) | - | 0.02145 | 0.02823 |

**EDA**

|                         |                   |                   |                   |                   |           |          |
|-------------------------|-------------------|-------------------|-------------------|-------------------|-----------|----------|
| rs2281932 (GG, GA, AA)  | 8.46±6.299 (487)  | 8.174±4.868 (163) | 7.735±3.905 (41)  | 7.576±4.066 (138) | 0.1954    | 0.02977  |
| rs1202987 (GG, GA, AA)  | 8.133±5.274 (562) | 8.357±5.611 (131) | 8.977±4.735 (30)  | 8.307±7.379 (106) | 0.1567    | 0.1826   |
| rs1203008 (AA, AG, GG)  | 8.132±5.543 (573) | 8.652±6.85 (128)  | 9.484±5.168 (25)  | 7.872±4.245 (103) | 0.06589   | 0.2533   |
| rs12156697 (GG, GA, AA) | 8.143±5.867 (555) | 8.558±5.651 (95)  | 9.506±5.069 (39)  | 7.466±3.837 (95)  | 0.01282   | 0.1729   |
| rs12849239 (GG, GA, AA) | 8.569±6.014 (375) | 8.043±5.561 (190) | 9.174±6.068 (92)  | 7.148±4.212 (172) | 0.0002358 | 0.001801 |
| rs12864026 (AA, AG, GG) | 8.1±5.335 (657)   | 9.599±7.833 (103) | 8.447±2.785 (9)   | 7.139±3.738 (60)  | 0.01226   | 0.1189   |
| rs1327347 (AA, AG, GG)  | 8.082±6.15 (428)  | 8.183±4.9 (176)   | 9.808±6.15 (59)   | 8.057±4.527 (166) | 0.00462   | 0.02426  |
| rs1327479 (CC, CG, GG)  | 8.23±5.395 (657)  | 8.196±4.523 (104) | 10.84±4.433 (6)   | 7.917±8.817 (62)  | 0.0726    | 0.2063   |
| rs1409997 (AA, AT, TT)  | 8.227±5.315 (691) | 8.154±4.699 (83)  | 10.8±5.721 (4)    | 8.044±9.652 (51)  | 0.175     | 0.1722   |
| rs1938018 (AA, AG, GG)  | 8.499±5.853 (425) | 8.347±6.138 (193) | 8.811±5.304 (65)  | 6.983±3.936 (146) | 0.0004061 | 0.009844 |
| rs1938022 (GG, GA, AA)  | 8.113±5.603 (392) | 8.481±6.449 (195) | 9.096±5.65 (65)   | 7.853±4.53 (177)  | 0.05811   | 0.1023   |
| rs1938026 (GG, GA, AA)  | 8.136±5.277 (606) | 8.239±5.255 (122) | 10.08±4.759 (17)  | 8.428±8.12 (84)   | 0.04114   | 0.07024  |
| rs1938029 (AA, AG, GG)  | 8.13±5.283 (604)  | 8.239±5.255 (122) | 10.08±4.759 (17)  | 8.465±8.037 (86)  | 0.03998   | 0.0642   |
| rs2188451 (CC, CG, GG)  | 8.546±5.967 (379) | 8.131±5.745 (192) | 8.973±5.85 (92)   | 7.166±4.218 (166) | 0.0009479 | 0.005587 |
| rs2188454 (AA, AG, GG)  | 8.01±4.846 (564)  | 8.713±6.755 (134) | 9.157±5.276 (26)  | 8.513±7.641 (104) | 0.1163    | 0.1891   |
| rs2247412 (AA, AG, GG)  | 8.188±5.258 (572) | 8.235±5.625 (134) | 8.541±3.729 (20)  | 8.377±7.624 (101) | 0.3582    | 0.07303  |
| rs2296765 (GG, GA, AA)  | 8.322±6.135 (428) | 8.617±5.643 (175) | 8.355±5.131 (64)  | 7.472±4.093 (162) | 0.04502   | 0.467    |
| rs2520385 (GG, GA, AA)  | 8.091±4.869 (604) | 8.53±6.859 (115)  | 9.53±5.924 (20)   | 8.404±8.006 (90)  | 0.213     | 0.2664   |
| rs2520391 (CC, CA, AA)  | 8.568±5.992 (375) | 7.86±4.457 (194)  | 9.533±7.789 (91)  | 7.157±4.191 (169) | 0.0004332 | 0.002548 |
| rs2804361 (AA, AC, CC)  | 7.977±5.02 (338)  | 8.473±6.112 (192) | 9.123±5.692 (87)  | 8.011±5.988 (212) | 0.01734   | 0.1732   |
| rs2804385 (AA, AG, GG)  | 8.122±5.249 (536) | 8.376±5.807 (145) | 8.422±3.425 (29)  | 8.479±7.329 (115) | 0.2803    | 0.03788  |
| rs2804389 (AA, AT, TT)  | 8.568±5.992 (375) | 7.86±4.457 (194)  | 9.533±7.789 (91)  | 7.172±4.199 (168) | 0.0005074 | 0.002795 |
| rs5936491 (GG, GA, AA)  | 8.456±6.095 (558) | 7.634±4.155 (144) | 9.178±5.713 (32)  | 7.406±4.331 (94)  | 0.02051   | 0.01222  |
| rs5936510 (GG, GA, AA)  | 8.2±5.869 (599)   | 8.81±5.675 (112)  | 9.004±4.415 (23)  | 7.466±3.837 (95)  | 0.02846   | 0.3011   |
| rs5936707 (TT, TA, AA)  | 8.186±5.693 (677) | 8.767±5.993 (88)  | 10.79±4.297 (9)   | 7.405±3.818 (54)  | 0.02335   | 0.05804  |
| rs5936776 (TT, TA, AA)  | 8.106±4.841 (572) | 8.423±6.867 (132) | 9.393±5.648 (22)  | 8.351±7.554 (103) | 0.2524    | 0.1058   |
| rs5936811 (AA, AG, GG)  | 8.288±6.17 (443)  | 8.218±5.385 (174) | 8.933±4.85 (51)   | 7.812±4.343 (161) | 0.1177    | 0.3697   |
| rs5936820 (CC, CA, AA)  | 8.274±6.02 (523)  | 8.406±5.311 (150) | 7.486±3.762 (36)  | 7.979±4.527 (120) | 0.281     | 0.0831   |
| rs5980827 (GG, GA, AA)  | 8.214±5.862 (590) | 8.659±5.948 (122) | 9.027±3.643 (18)  | 7.573±3.598 (99)  | 0.08099   | 0.356    |
| rs5980855 (CC, CG, GG)  | 7.947±4.723 (471) | 8.428±6.27 (168)  | 9.26±6.242 (42)   | 8.562±7.066 (148) | 0.1208    | 0.0177   |
| rs5980867 (AA, AC, CC)  | 7.86±4.649 (437)  | 8.541±6.355 (180) | 9.116±5.736 (51)  | 8.558±6.919 (161) | 0.04998   | 0.01015  |
| rs5980890 (GG, GA, AA)  | 8.199±5.601 (391) | 8.803±5.492 (191) | 7.461±3.503 (71)  | 7.945±6.391 (176) | 0.03413   | 0.08434  |
| rs5980892 (AA, AG, GG)  | 8.304±6.045 (516) | 8.33±5.352 (151)  | 7.711±3.596 (39)  | 7.898±4.485 (123) | 0.4255    | 0.1801   |
| rs6625546 (GG, GA, AA)  | 8.011±4.834 (399) | 8.725±5.737 (205) | 8.801±7.264 (73)  | 7.812±6.386 (152) | 0.03605   | 0.5447   |
| rs6625561 (AA, AG, GG)  | 8.02±5.376 (523)  | 9.147±6.363 (161) | 9.598±9.397 (32)  | 7.439±3.66 (113)  | 0.004738  | 0.1421   |
| rs7876773 (GG, GA, AA)  | 8.007±4.827 (488) | 8.998±6.675 (173) | 7.822±4.788 (43)  | 8.118±6.945 (125) | 0.03383   | 0.08073  |
| rs7882379 (GG, GA, AA)  | 8.084±5.672 (488) | 8.767±5.882 (172) | 8.78±4.821 (42)   | 7.822±5.24 (127)  | 0.02323   | 0.5046   |
| rs7888085 (CC, CA, AA)  | 8.082±4.88 (415)  | 8.792±6.423 (202) | 8.47±5.18 (64)    | 7.721±6.459 (148) | 0.03534   | 0.5628   |
| rs882137 (AA, AC, CC)   | 8.578±5.987 (375) | 7.922±4.515 (193) | 9.405±7.758 (91)  | 7.138±4.186 (170) | 0.0004845 | 0.003443 |
| rs3795170 (AA, AC, CC)  | 8.422±6.572 (407) | 8.278±4.801 (187) | 8.531±4.828 (60)  | 7.586±4.01 (175)  | 0.1013    | 0.2311   |
| rs5936531 (CC, CG, GG)  | 7.926±5.685 (319) | 8.628±6.085 (210) | 9.054±5.871 (88)  | 7.863±4.787 (211) | 0.009241  | 0.4138   |
| rs6625563 (GG, GA, AA)  | 8.225±5.251 (432) | 8.613±6.133 (182) | 7.774±3.717 (65)  | 7.925±6.584 (150) | 0.2009    | 0.1728   |
| rs1938024 (AA, AG, GG)  | 8.061±5.582 (712) | 9.268±5.702 (72)  | -9.068±5.839 (45) |                   | 0.02159   | 0.01901  |
| rs5936523 (GG, GA, AA)  | 8.083±5.532 (425) | 8.67±6.713 (184)  | 8.803±4.887 (54)  | 7.93±4.673 (161)  | 0.0788    | 0.2004   |
| rs5936524 (AA, AC, CC)  | 8±5.207 (580)     | 8.405±5.17 (126)  | 9.663±4.441 (22)  | 8.745±7.855 (100) | 0.01564   | 0.03613  |
| rs5936796 (GG, GA, AA)  | 7.995±5.222 (487) | 8.221±5.135 (154) | 9.783±6.008 (44)  | 8.557±7.113 (141) | 0.01239   | 0.007792 |

**INTERLEUKIN-1 FAMILY**

***IL1A***

|                        |                   |                   |                   |   |         |         |
|------------------------|-------------------|-------------------|-------------------|---|---------|---------|
| rs17561 (CC, CA, AA)   | 7.869±4.85 (396)  | 8.284±4.819 (365) | 9.931±10.99 (68)  | - | 0.03963 | 0.03846 |
| rs2856838 (GG, GA, AA) | 8.594±6.772 (302) | 8.053±4.832 (394) | 7.872±4.799 (133) | - | 0.1639  | 0.1919  |
| rs3783512 (GG, GA, AA) | 8.328±6.192 (410) | 8.277±5.136 (339) | 7.489±4.26 (79)   | - | 0.1646  | 0.2365  |
| rs2856836 (AA, AG, GG) | 7.869±4.85 (396)  | 8.284±4.819 (365) | 9.931±10.99 (68)  | - | 0.03963 | 0.03846 |

***IL1B***

|                         |                   |                   |                   |   |        |         |
|-------------------------|-------------------|-------------------|-------------------|---|--------|---------|
| rs1143627 (AA, AG, GG)  | 8.444±5.647 (379) | 8.093±5.739 (364) | 7.778±4.901 (86)  | - | 0.168  | 0.09924 |
| rs1143634 (GG, GA, AA)  | 7.981±4.88 (470)  | 8.444±6.019 (321) | 9.302±9.358 (38)  | - | 0.1309 | 0.1375  |
| rs12621220 (GG, GA, AA) | 8.348±5.47 (459)  | 8.15±6.075 (308)  | 7.632±4.108 (62)  | - | 0.2915 | 0.2423  |
| rs3917365 (GG, GA, AA)  | 8.31±5.782 (696)  | 7.737±4.683 (125) | 8.01±3.763 (8)    | - | 0.3086 | 0.1294  |
| rs3917368 (GG, GA, AA)  | 8.431±6.583 (330) | 7.864±4.429 (395) | 8.908±6.225 (104) | - | 0.232  | 0.2036  |
| rs4848306 (GG, GA, AA)  | 8.397±7.35 (224)  | 8.037±4.586 (422) | 8.43±5.325 (183)  | - | 0.4862 | 0.3087  |

***IL1RN***

|                        |                   |                   |                   |   |         |         |
|------------------------|-------------------|-------------------|-------------------|---|---------|---------|
| rs2637988 (AA, AG, GG) | 8.299±5.639 (300) | 8.098±5.753 (398) | 8.415±5.137 (131) | - | 0.3136  | 0.3959  |
| rs3087263 (GG, GA, AA) | 8.164±5.752 (682) | 8.459±4.985 (135) | 8.758±4.43 (12)   | - | 0.3502  | 0.587   |
| rs315920 (GG, GA, AA)  | 8.114±5.353 (527) | 8.362±6.062 (261) | 8.604±6.053 (40)  | - | 0.898   | 0.7074  |
| rs315921 (GG, GA, AA)  | 8.141±5.369 (553) | 8.329±6.02 (244)  | 8.676±6.693 (31)  | - | 0.6667  | 0.4748  |
| rs315943 (AA, AG, GG)  | 8.026±5.063 (309) | 8.496±6.369 (391) | 7.852±4.252 (129) | - | 0.1756  | 0.1306  |
| rs315946 (GG, GA, AA)  | 8.183±5.311 (604) | 8.379±6.633 (200) | 7.858±3.646 (25)  | - | 0.3184  | 0.1804  |
| rs3213448 (GG, GA, AA) | 8.208±5.7 (648)   | 8.266±5.361 (170) | 8.265±4.576 (11)  | - | 0.7045  | 0.3983  |
| rs380092 (TT, TA, AA)  | 8.354±5.575 (391) | 7.902±5.541 (346) | 8.856±6.02 (92)   | - | 0.04436 | 0.05462 |
| rs3997211 (AA, AG, GG) | 8.196±5.482 (380) | 8.41±6.011 (366)  | 7.498±4.212 (83)  | - | 0.1863  | 0.171   |
| rs408392 (CC, CA, AA)  | 8.221±5.49 (420)  | 8.197±5.933 (342) | 8.338±4.697 (67)  | - | 0.5889  | 0.4293  |
| rs4251961 (AA, AG, GG) | 8.224±5.234 (321) | 8.312±6.221 (397) | 7.886±4.243 (111) | - | 0.6559  | 0.5639  |
| rs4252042 (GG, GA, AA) | 8.181±5.677 (681) | 8.431±5.368 (140) | 7.964±4.869 (8)   | - | 0.4413  | 0.1922  |
| rs454078 (TT, TA, AA)  | 8.221±5.49 (420)  | 8.197±5.933 (342) | 8.338±4.697 (67)  | - | 0.5889  | 0.4293  |

***IL18***

|                        |                   |                   |                   |   |         |         |
|------------------------|-------------------|-------------------|-------------------|---|---------|---------|
| rs360722 (GG, GA, AA)  | 8.182±5.324 (652) | 8.49±6.832 (161)  | 7.091±2.99 (16)   | - | 0.4519  | 0.3503  |
| rs543810 (AA, AG, GG)  | 8.182±5.324 (652) | 8.528±6.837 (160) | 7.091±2.99 (16)   | - | 0.3998  | 0.2871  |
| rs549908 (AA, AC, CC)  | 8.244±5.99 (406)  | 8.038±5.086 (351) | 8.986±5.879 (72)  | - | 0.246   | 0.5751  |
| rs5744247 (GG, GC, CC) | 8.176±5.373 (671) | 8.469±6.792 (145) | 8.235±2.448 (12)  | - | 0.3389  | 0.1619  |
| rs5744258 (CC, CG, GG) | 8.111±5.174 (493) | 8.491±6.305 (291) | 7.671±5.542 (45)  | - | 0.1171  | 0.08781 |
| rs5744280 (GG, GA, AA) | 8.476±6.057 (354) | 7.973±5.304 (362) | 8.213±5.125 (113) | - | 0.2386  | 0.3564  |
| rs2043055 (AA, AG, GG) | 8.583±6.116 (319) | 7.826±5.227 (371) | 8.443±5.37 (139)  | - | 0.06928 | 0.1201  |
| rs1293344 (AA, AG, GG) | 8.227±5.954 (457) | 8.026±5.044 (312) | 9.187±5.744 (60)  | - | 0.1226  | 0.3041  |
| rs1946519 (CC, CA, AA) | 8.272±5.509 (305) | 8.035±5.868 (395) | 8.669±5.044 (129) | - | 0.1383  | 0.1147  |

***IL1F5; IL1F10***

|                         |                   |                   |                   |   |         |         |
|-------------------------|-------------------|-------------------|-------------------|---|---------|---------|
| rs10165797 (CC, CA, AA) | 7.906±4.69 (230)  | 8.207±5.657 (404) | 8.622±6.463 (195) | - | 0.3555  | 0.1471  |
| rs10206428 (GG, GA, AA) | 8.218±4.657 (294) | 8.139±6.192 (407) | 8.486±5.721 (128) | - | 0.324   | 0.5647  |
| rs1156701 (GG, GA, AA)  | 8.078±5.45 (672)  | 8.884±6.327 (152) | 7.23±2.661 (5)    | - | 0.06414 | 0.02495 |
| rs12469822 (AA, AG, GG) | 8.275±6.02 (299)  | 8.058±5.175 (394) | 8.574±5.923 (136) | - | 0.5143  | 0.3932  |
| rs12711749 (AA, AG, GG) | 8.202±4.834 (308) | 8.079±6.046 (404) | 8.761±5.978 (117) | - | 0.2801  | 0.5006  |
| rs1446521 (AA, AG, GG)  | 8.207±4.794 (373) | 8.13±6.21 (382)   | 8.761±6.22 (74)   | - | 0.3828  | 0.7973  |
| rs1446522 (CC, CG, GG)  | 8.083±5.459 (669) | 8.849±6.28 (155)  | 7.23±2.661 (5)    | - | 0.07186 | 0.02428 |
| rs17042750 (AA, AC, CC) | 8.215±5.68 (709)  | 8.216±5.237 (115) | 9.146±5.477 (5)   | - | 0.4865  | 0.3652  |
| rs1867834 (GG, GA, AA)  | 8.669±6.227 (251) | 8.088±5.576 (399) | 7.876±4.717 (178) | - | 0.2054  | 0.0948  |
| rs2100071 (AA, AC, CC)  | 8.241±4.811 (367) | 8.111±6.184 (386) | 8.753±6.199 (75)  | - | 0.3082  | 0.6622  |
| rs2862853 (AA, AG, GG)  | 8.241±4.811 (367) | 8.098±6.181 (387) | 8.753±6.199 (75)  | - | 0.2838  | 0.6305  |
| rs3811050 (GG, GA, AA)  | 8.159±5.625 (600) | 8.373±5.676 (217) | 8.575±3.937 (12)  | - | 0.2311  | 0.2499  |
| rs3811053 (AA, AG, GG)  | 8.235±5.719 (689) | 8.164±5.124 (132) | 7.91±4.535 (8)    | - | 0.8351  | 0.5659  |
| rs3827763 (GG, GA, AA)  | 8.283±5.819 (390) | 7.99±5.156 (356)  | 8.918±6.457 (83)  | - | 0.3301  | 0.4872  |
| rs4145013 (AA, AG, GG)  | 8.28±5.795 (361)  | 8.073±5.307 (370) | 8.56±6.08 (98)    | - | 0.4727  | 0.3548  |
| rs4849148 (AA, AG, GG)  | 8.2±5.706 (725)   | 8.363±4.942 (104) | -                 | - | 0.6364  | 0.5838  |
| rs6761276 (GG, GA, AA)  | 8.446±6.179 (271) | 7.836±4.999 (419) | 8.942±6.132 (139) | - | 0.07576 | 0.06206 |
| rs7599662 (GG, GA, AA)  | 8.241±4.811 (367) | 8.098±6.181 (387) | 8.753±6.199 (75)  | - | 0.2838  | 0.6305  |
| rs921065 (AA, AG, GG)   | 8.542±6.466 (209) | 8.205±5.581 (407) | 7.936±4.714 (213) | - | 0.4911  | 0.1892  |
| rs2515402 (AA, AC, CC)  | 8.218±4.657 (294) | 8.139±6.192 (407) | 8.486±5.721 (128) | - | 0.324   | 0.5647  |
| rs957200 (CC, CA, AA)   | 8.075±5.45 (672)  | 8.898±6.326 (152) | 7.23±2.661 (5)    | - | 0.05852 | 0.02469 |

***IL1F5; IL1F10; IL1F8***

|                        |                   |                   |                |   |         |         |
|------------------------|-------------------|-------------------|----------------|---|---------|---------|
| rs1530549 (AA, AG, GG) | 8.071±5.447 (673) | 8.924±6.339 (151) | 7.23±2.661 (5) | - | 0.05119 | 0.02209 |
|------------------------|-------------------|-------------------|----------------|---|---------|---------|

***IL1F5; IL1F8***

|                        |                   |                   |                  |   |         |          |
|------------------------|-------------------|-------------------|------------------|---|---------|----------|
| rs1562302 (GG, GA, AA) | 7.996±5.541 (575) | 8.717±5.87 (234)  | 9.003±4.315 (19) | - | 0.01618 | 0.007096 |
| rs9678578 (AA, AT, TT) | 8.241±4.811 (367) | 8.108±6.184 (386) | 8.698±6.189 (76) | - | 0.3122  | 0.6508   |

**IL1F6**

|                        |                   |                   |                  |   |          |          |
|------------------------|-------------------|-------------------|------------------|---|----------|----------|
| rs895497 (GG, GA, AA)  | 8.398±6.274 (400) | 7.854±4.594 (349) | 8.936±6.099 (80) | - | 0.1155   | 0.2491   |
| rs1446512 (CC, CA, AA) | 8.374±6.249 (404) | 7.876±4.614 (345) | 8.936±6.099 (80) | - | 0.13     | 0.2555   |
| rs2305152 (AA, AC, CC) | 8.586±5.712 (385) | 7.663±5.499 (349) | 8.838±5.553 (93) | - | 0.005048 | 0.005143 |
| rs6714534 (AA, AG, GG) | 8.118±4.968 (596) | 8.185±6.321 (212) | 11.5±11.72 (21)  | - | 0.04288  | 0.04017  |

**IL1F7**

|                         |                   |                   |                  |   |         |         |
|-------------------------|-------------------|-------------------|------------------|---|---------|---------|
| rs13023984 (CC, CA, AA) | 8.221±5.823 (685) | 8.284±4.549 (139) | 6.492±2.537 (5)  | - | 0.2434  | 0.2839  |
| rs2708943 (GG, GC, CC)  | 8.21±5.813 (688)  | 8.331±4.564 (137) | 6.393±2.918 (4)  | - | 0.194   | 0.2505  |
| rs2708947 (AA, AG, GG)  | 8.205±5.816 (687) | 8.331±4.564 (137) | 6.393±2.918 (4)  | - | 0.1902  | 0.2487  |
| rs2723187 (GG, GA, AA)  | 8.21±5.813 (688)  | 8.331±4.564 (137) | 6.393±2.918 (4)  | - | 0.194   | 0.2505  |
| rs2723192 (GG, GA, AA)  | 8.21±5.813 (688)  | 8.331±4.564 (137) | 6.393±2.918 (4)  | - | 0.194   | 0.2505  |
| rs4241122 (AA, AG, GG)  | 7.983±5.024 (405) | 8.37±5.744 (358)  | 8.867±7.899 (66) | - | 0.08456 | 0.06709 |
| rs4458215 (AA, AG, GG)  | 7.964±4.798 (517) | 8.613±6.33 (284)  | 8.981±10.15 (28) | - | 0.1183  | 0.1106  |

**IL1F8**

|                         |                   |                   |                   |   |         |         |
|-------------------------|-------------------|-------------------|-------------------|---|---------|---------|
| rs1006122 (GG, GC, CC)  | 8.365±6.281 (399) | 7.929±4.517 (349) | 8.766±6.352 (81)  | - | 0.3611  | 0.4553  |
| rs11883847 (GG, GA, AA) | 8.219±5.683 (708) | 8.19±5.221 (116)  | 9.146±5.477 (5)   | - | 0.5018  | 0.3854  |
| rs12711747 (GG, GA, AA) | 8.054±4.997 (252) | 8.103±5.411 (429) | 8.846±7.009 (148) | - | 0.3101  | 0.1589  |
| rs13030063 (AA, AG, GG) | 8.111±5.02 (251)  | 8.052±5.424 (426) | 8.88±6.931 (151)  | - | 0.2011  | 0.1076  |
| rs1374280 (GG, GA, AA)  | 8.481±6.074 (283) | 8.137±5.515 (405) | 7.94±4.905 (141)  | - | 0.458   | 0.1665  |
| rs17660913 (AA, AG, GG) | 8.056±4.954 (629) | 8.464±6.513 (186) | 12.4±14.03 (14)   | - | 0.05423 | 0.04681 |
| rs2862772 (GG, GC, CC)  | 8.056±4.897 (259) | 8.244±5.553 (410) | 8.43±6.765 (160)  | - | 0.4758  | 0.2461  |
| rs2862774 (AA, AC, CC)  | 8.142±5.558 (547) | 8.31±5.758 (261)  | 9.18±5.377 (21)   | - | 0.196   | 0.07686 |
| rs2862776 (AA, AG, GG)  | 8.235±4.842 (360) | 8.147±6.172 (386) | 8.506±6.049 (83)  | - | 0.4346  | 0.8001  |
| rs4849143 (CC, CG, GG)  | 8.193±4.805 (370) | 8.159±6.197 (382) | 8.663±6.204 (77)  | - | 0.5035  | 0.8164  |
| rs6724667 (AA, AG, GG)  | 8.235±4.842 (360) | 8.137±6.167 (387) | 8.555±6.069 (82)  | - | 0.4326  | 0.8415  |
| rs6744288 (AA, AT, TT)  | 8.096±4.955 (268) | 8.069±5.476 (409) | 8.849±6.919 (152) | - | 0.2379  | 0.1288  |

**IL1F9**

|                         |                   |                   |                   |   |          |          |
|-------------------------|-------------------|-------------------|-------------------|---|----------|----------|
| rs11690399 (CC, CA, AA) | 8.426±5.256 (238) | 7.878±4.635 (388) | 8.636±7.426 (203) | - | 0.1789   | 0.1545   |
| rs11695148 (AA, AG, GG) | 8.206±5.414 (520) | 8.28±6.065 (280)  | 7.911±4.683 (29)  | - | 0.6999   | 0.5642   |
| rs13029531 (GG, GA, AA) | 8.436±5.261 (236) | 7.86±4.626 (391)  | 8.668±7.444 (202) | - | 0.1445   | 0.122    |
| rs13392494 (GG, GA, AA) | 8.102±4.968 (598) | 8.275±6.341 (209) | 10.93±11.6 (22)   | - | 0.1255   | 0.1044   |
| rs13418326 (GG, GC, CC) | 8.553±5.734 (382) | 7.75±5.487 (353)  | 8.637±5.516 (94)  | - | 0.02771  | 0.02375  |
| rs6542107 (AA, AG, GG)  | 8.085±4.957 (601) | 8.294±6.359 (208) | 11.53±12.02 (20)  | - | 0.05682  | 0.04734  |
| rs6743744 (AA, AG, GG)  | 8.34±5.746 (700)  | 7.311±4.2 (122)   | 12.13±10.52 (7)   | - | 0.002859 | 0.002149 |
| rs7584409 (AA, AG, GG)  | 8.33±6.256 (400)  | 7.952±4.628 (349) | 8.847±6.119 (80)  | - | 0.2695   | 0.3216   |
| rs4849136 (AA, AG, GG)  | 8.381±6.263 (403) | 7.879±4.586 (348) | 8.916±6.177 (78)  | - | 0.1726   | 0.3145   |

**IL1F10**

|                         |                   |                   |                   |   |        |        |
|-------------------------|-------------------|-------------------|-------------------|---|--------|--------|
| rs11123159 (AA, AG, GG) | 8.203±5.659 (716) | 8.312±5.352 (108) | 8.856±5.629 (5)   | - | 0.5003 | 0.4016 |
| rs11123160 (AA, AT, TT) | 8.229±5.734 (421) | 8.084±5.284 (348) | 8.958±6.577 (60)  | - | 0.5467 | 0.6444 |
| rs12711751 (CC, CA, AA) | 8.237±5.737 (360) | 8.009±5.303 (375) | 9.004±6.292 (94)  | - | 0.3312 | 0.2802 |
| rs12711752 (AA, AG, GG) | 8.516±5.632 (220) | 8.085±6.006 (424) | 8.181±4.58 (185)  | - | 0.3135 | 0.2692 |
| rs13011842 (GG, GA, AA) | 8.253±5.425 (485) | 8.175±6.062 (297) | 8.184±4.588 (47)  | - | 0.6599 | 0.462  |
| rs13409360 (GG, GA, AA) | 8.213±5.207 (292) | 8.188±6.079 (424) | 8.363±4.786 (113) | - | 0.5059 | 0.5307 |
| rs7574787 (CC, CA, AA)  | 8.139±5.409 (542) | 8.312±5.926 (253) | 8.855±6.503 (34)  | - | 0.8942 | 0.655  |

**INTERLEUKIN-6 FAMILY****IL6**

|                         |                   |                   |                   |   |         |         |
|-------------------------|-------------------|-------------------|-------------------|---|---------|---------|
| rs1800795 (CC,CG, GG)   | 8.143±4.679 (255) | 8.563±6.484 (405) | 7.518±4.506 (169) | - | 0.03319 | 0.04482 |
| rs1800797 (GG, GA, AA)  | 8.16±4.631 (262)  | 8.52±6.478 (405)  | 7.572±4.619 (162) | - | 0.04002 | 0.06406 |
| rs2069840 (GG, GC, CC)  | 8.151±5.575 (368) | 8.328±5.851 (355) | 8.105±4.937 (106) | - | 0.4129  | 0.2315  |
| rs10242595 (GG, GA, AA) | 7.908±5.624 (454) | 8.627±5.709 (315) | 8.457±4.919 (60)  | - | 0.01526 | 0.02363 |
| rs11766273 (GG, GA, AA) | 8.279±5.746 (711) | 7.77±4.597 (112)  | 9.708±7.228 (6)   | - | 0.2901  | 0.4694  |
| rs12700386 (GG, GC, CC) | 8.193±5.356 (560) | 8.455±6.445 (228) | 7.297±3.807 (41)  | - | 0.2208  | 0.1673  |
| rs2069824 (AA, AG, GG)  | 8.097±5.351 (720) | 9.229±7.192 (104) | 5.124±1.353 (5)   | - | 0.04422 | 0.02862 |
| rs2069827 (CC, CA, AA)  | 8.372±5.88 (666)  | 7.567±4.23 (153)  | 8.137±5.776 (10)  | - | 0.1495  | 0.1506  |
| rs2069861 (GG, GA, AA)  | 8.259±5.846 (677) | 8.091±4.481 (148) | 6.583±2.523 (4)   | - | 0.6859  | 0.6336  |

**IL1I**

|                        |                   |                   |                   |   |        |         |
|------------------------|-------------------|-------------------|-------------------|---|--------|---------|
| rs2124920 (GG, GA, AA) | 8.334±5.828 (723) | 7.471±3.78 (105)  | -                 | - | 0.3111 | 0.2366  |
| rs897799 (AA, AG, GG)  | 8.073±4.974 (534) | 8.55±6.777 (253)  | 8.111±5.613 (42)  | - | 0.6268 | 0.5263  |
| rs1042506 (AA, AC, CC) | 8.028±4.843 (621) | 8.898±7.679 (185) | 7.971±5.174 (23)  | - | 0.6319 | 0.5707  |
| rs1126757 (GG, GA, AA) | 7.939±5.131 (222) | 8.196±5.565 (428) | 8.627±6.312 (176) | - | 0.1003 | 0.01625 |

**IL12A**

|                         |                   |                   |                   |   |         |        |
|-------------------------|-------------------|-------------------|-------------------|---|---------|--------|
| rs17826053 (AA, AC, CC) | 8.18±5.332 (601)  | 8.335±6.425 (212) | 8.261±4.627 (16)  | - | 0.7489  | 0.6539 |
| rs2243115 (AA, AC, CC)  | 8.266±5.842 (660) | 7.967±4.691 (157) | 9.043±3.676 (12)  | - | 0.2583  | 0.3383 |
| rs2243123 (AA, AG, GG)  | 8.224±5.543 (417) | 8±5.495 (328)     | 9.066±6.364 (84)  | - | 0.2083  | 0.2312 |
| rs2243131 (AA, AC, CC)  | 8.236±5.417 (567) | 8.237±6.223 (231) | 8.314±5.002 (18)  | - | 0.6285  | 0.5767 |
| rs2243136 (AA, AG, GG)  | 8.239±5.784 (644) | 7.867±4.824 (128) | 8.591±3.946 (41)  | - | 0.1358  | 0.1237 |
| rs2243143 (GG, GA, AA)  | 8.222±5.794 (295) | 8.058±5.524 (390) | 8.659±5.493 (144) | - | 0.1892  | 0.275  |
| rs2243151 (AA, AT, TT)  | 8.222±5.794 (295) | 8.063±5.53 (389)  | 8.641±5.478 (145) | - | 0.1974  | 0.2741 |
| rs2243154 (GG, GA, AA)  | 8.296±5.746 (681) | 7.876±4.994 (143) | 7.852±4.401 (5)   | - | 0.4975  | 0.5522 |
| rs583911 (AA, AG, GG)   | 8.709±6.453 (269) | 7.709±4.348 (408) | 8.703±6.835 (151) | - | 0.05247 | 0.1524 |
| rs668998 (AA, AG, GG)   | 8.715±6.442 (270) | 7.695±4.316 (408) | 8.73±6.906 (150)  | - | 0.04685 | 0.1379 |
| rs890914 (AA, AG, GG)   | 8.266±5.842 (660) | 7.967±4.691 (157) | 9.043±3.676 (12)  | - | 0.2583  | 0.3383 |

**IL12B**

|                         |                   |                   |                   |   |         |         |
|-------------------------|-------------------|-------------------|-------------------|---|---------|---------|
| rs1003199 (AA, AG, GG)  | 8.177±6.398 (232) | 8.037±4.517 (390) | 8.617±6.481 (207) | - | 0.454   | 0.5467  |
| rs10052709 (GG, GC, CC) | 8.162±5.455 (629) | 8.366±5.969 (193) | 9.484±9.543 (7)   | - | 0.783   | 0.6222  |
| rs1433048 (AA, AG, GG)  | 8.171±5.941 (550) | 8.233±4.659 (239) | 8.83±6.262 (40)   | - | 0.3106  | 0.3963  |
| rs2546890 (AA, AG, GG)  | 8.614±6.269 (247) | 7.901±4.711 (423) | 8.461±6.64 (159)  | - | 0.09838 | 0.1456  |
| rs2546893 (AA, AG, GG)  | 7.858±6.193 (235) | 8.359±5.289 (388) | 8.375±5.522 (206) | - | 0.09677 | 0.09151 |
| rs2569253 (GG, GA, AA)  | 8.224±6.396 (234) | 7.979±4.468 (389) | 8.674±6.532 (206) | - | 0.3934  | 0.6218  |
| rs2853694 (CC, CA, AA)  | 8.317±4.387 (229) | 7.98±5.727 (418)  | 8.653±6.633 (182) | - | 0.04541 | 0.06495 |
| rs2853696 (GG, GA, AA)  | 8.264±6.028 (528) | 8.132±4.842 (265) | 8.247±4.62 (36)   | - | 0.6491  | 0.7306  |
| rs3181224 (AA, AG, GG)  | 8.134±5.407 (659) | 8.497±6.282 (161) | 9.825±8.483 (8)   | - | 0.5172  | 0.6569  |
| rs3181225 (GG, GA, AA)  | 8.326±5.285 (541) | 7.993±6.285 (252) | 8.239±5.538 (36)  | - | 0.1091  | 0.2006  |
| rs6859018 (GG, GA, AA)  | 8.207±5.477 (572) | 8.11±5.75 (233)   | 9.635±7.337 (24)  | - | 0.6145  | 0.7979  |
| rs919766 (AA, AC, CC)   | 8.13±5.41 (658)   | 8.51±6.246 (163)  | 9.825±8.483 (8)   | - | 0.4951  | 0.6326  |

**IL23A**

|                        |                   |                   |   |   |        |        |
|------------------------|-------------------|-------------------|---|---|--------|--------|
| rs2371494 (GG, GA, AA) | 8.247±5.792 (724) | 8.041±4.194 (105) | - | - | 0.8486 | 0.6857 |
| rs2066808 (AA, AG, GG) | 8.247±5.792 (724) | 8.041±4.194 (105) | - | - | 0.8486 | 0.6857 |

**OSM**

|                         |                   |                   |                   |   |         |         |
|-------------------------|-------------------|-------------------|-------------------|---|---------|---------|
| rs11089441 (CC, CA, AA) | 8.505±6.141 (402) | 8.052±5.288 (350) | 7.507±3.853 (77)  | - | 0.213   | 0.3211  |
| rs2070889 (GG, GA, AA)  | 8.313±5.724 (545) | 7.874±5.393 (256) | 9.598±5.317 (28)  | - | 0.02873 | 0.01824 |
| rs9608859 (GG, GA, AA)  | 8.292±5.116 (255) | 8.067±5.369 (433) | 8.563±7.052 (141) | - | 0.2292  | 0.2344  |

**LIF**

|                        |                   |                   |                  |   |         |        |
|------------------------|-------------------|-------------------|------------------|---|---------|--------|
| rs2267153 (CC, CG, GG) | 8.551±6.256 (397) | 8.001±5.133 (356) | 7.525±3.897 (76) | - | 0.2041  | 0.2787 |
| rs3761427 (CC, CG, GG) | 8.537±6.244 (399) | 8.003±5.141 (355) | 7.569±3.903 (75) | - | 0.2341  | 0.3158 |
| rs715605 (AA, AG, GG)  | 8.103±5.57 (704)  | 8.912±5.962 (118) | 8.386±2.973 (7)  | - | 0.1592  | 0.2817 |
| rs737921 (GG, GA, AA)  | 8.197±5.093 (485) | 7.938±5.2 (297)   | 10.25±10.75 (47) | - | 0.05805 | 0.1327 |
| rs929271 (AA, AC, CC)  | 8.458±6.139 (380) | 8.144±5.35 (370)  | 7.442±3.88 (79)  | - | 0.2361  | 0.3952 |
| rs929273 (GG, GA, AA)  | 8.426±6.051 (403) | 8.129±5.373 (354) | 7.522±3.981 (72) | - | 0.277   | 0.4956 |
| rs9606708 (CC, CA, AA) | 8.507±6.183 (396) | 8.05±5.244 (355)  | 7.48±3.897 (77)  | - | 0.2207  | 0.3254 |

**CNTF**

|                         |                   |                   |                   |   |          |         |
|-------------------------|-------------------|-------------------|-------------------|---|----------|---------|
| rs11229549 (AA, AG, GG) | 8.313±5.198 (575) | 8.036±6.721 (227) | 7.807±3.714 (27)  | - | 0.07281  | 0.1379  |
| rs2507763 (AA, AG, GG)  | 8.262±4.774 (272) | 8.427±5.892 (388) | 7.682±6.178 (169) | - | 0.08554  | 0.06384 |
| rs3168135 (GG, GA, AA)  | 8.386±4.746 (452) | 7.988±5.852 (320) | 8.218±9.428 (57)  | - | 0.009088 | 0.01018 |
| rs550942 (AA, AG, GG)   | 8.177±5.988 (575) | 8.18±4.509 (230)  | 9.547±6.01 (23)   | - | 0.1793   | 0.3246  |
| rs17489568 (CC, CG, GG) | 8.256±6.036 (582) | 8.244±4.606 (224) | 7.111±2.712 (23)  | - | 0.3971   | 0.2782  |
| rs1800169 (GG, GA, AA)  | 8.276±6.015 (609) | 8.13±4.432 (202)  | 7.361±2.773 (18)  | - | 0.609    | 0.5357  |
| rs2509914 (GG, GA, AA)  | 8.262±4.774 (272) | 8.425±5.878 (390) | 7.677±6.212 (167) | - | 0.07824  | 0.06349 |

**CLCF1**

|                        |                   |                   |   |   |         |        |
|------------------------|-------------------|-------------------|---|---|---------|--------|
| rs3781941 (GG, GA, AA) | 8.064±5.315 (716) | 9.217±7.175 (113) | - | - | 0.07161 | 0.0264 |
|------------------------|-------------------|-------------------|---|---|---------|--------|

**CTF1**

|                        |                   |                   |                   |   |        |        |
|------------------------|-------------------|-------------------|-------------------|---|--------|--------|
| rs9933843 (AA, AG, GG) | 8.211±5.327 (292) | 8.114±5.218 (409) | 8.584±7.264 (128) | - | 0.5176 | 0.7427 |
|------------------------|-------------------|-------------------|-------------------|---|--------|--------|

**CSF3**

|                        |                   |                   |                   |   |         |         |
|------------------------|-------------------|-------------------|-------------------|---|---------|---------|
| rs2227322 (CC, CG, GG) | 8.01±5.382 (305)  | 8.145±5.195 (394) | 8.948±7.151 (130) | - | 0.02545 | 0.02292 |
| rs2827 (GG, GA, AA)    | 8.218±5.828 (595) | 8.276±5.161 (214) | 7.718±3.516 (20)  | - | 0.5044  | 0.3812  |
| rs8078723 (AA, AG, GG) | 8.014±5.39 (304)  | 8.091±5.072 (394) | 9.132±7.383 (130) | - | 0.01316 | 0.0113  |

**CTF1**

|                         |                   |                   |                   |   |        |        |
|-------------------------|-------------------|-------------------|-------------------|---|--------|--------|
| rs1046276 (GG, GA, AA)  | 8.333±5.304 (318) | 8.077±5.298 (395) | 8.402±7.282 (116) | - | 0.613  | 0.7755 |
| rs11649653 (GG, GC, CC) | 8.07±5.774 (314)  | 8.231±5.513 (389) | 8.573±5.578 (121) | - | 0.2546 | 0.3053 |



**CSF3**

|                        |                   |                   |                   |   |        |         |
|------------------------|-------------------|-------------------|-------------------|---|--------|---------|
| rs2270401 (AA, AT, TT) | 8.406±5.911 (347) | 8.166±5.233 (340) | 7.9±5.767 (142)   | - | 0.266  | 0.1448  |
| rs2302776 (AA, AG, GG) | 8.253±4.865 (270) | 8.436±6.288 (352) | 7.793±5.309 (206) | - | 0.1137 | 0.06112 |

**LEP**

|                         |                   |                   |                   |   |         |         |
|-------------------------|-------------------|-------------------|-------------------|---|---------|---------|
| rs10249476 (CC, CA, AA) | 8.215±5.771 (329) | 8.405±5.81 (394)  | 7.554±4.184 (106) | - | 0.131   | 0.1594  |
| rs10487506 (GG, GA, AA) | 8.173±4.628 (265) | 8.12±5.663 (385)  | 8.509±6.746 (179) | - | 0.3134  | 0.418   |
| rs11761556 (AA, AC, CC) | 8.233±6.007 (246) | 8.51±5.926 (405)  | 7.546±4.083 (178) | - | 0.05938 | 0.03367 |
| rs11763517 (AA, AG, GG) | 8.426±6.379 (230) | 8.009±5.354 (407) | 8.443±5.188 (190) | - | 0.1979  | 0.2016  |
| rs1349419 (GG, GA, AA)  | 8.157±5.982 (255) | 8.552±5.936 (398) | 7.564±4.063 (176) | - | 0.06975 | 0.05118 |
| rs2060715 (GG, GA, AA)  | 8.211±5.988 (248) | 8.53±5.949 (399)  | 7.557±4.093 (182) | - | 0.06101 | 0.03591 |
| rs2278815 (AA, AG, GG)  | 8.142±5.976 (256) | 8.599±5.977 (398) | 7.476±3.901 (175) | - | 0.04146 | 0.02948 |
| rs4236625 (AA, AT, TT)  | 8.273±5.766 (710) | 7.91±4.605 (119)  | -                 | - | 0.6418  | 0.3393  |
| rs7795794 (GG, GA, AA)  | 8.301±5.773 (712) | 7.73±4.511 (117)  | -                 | - | 0.3856  | 0.1903  |

<sup>a</sup> For description of candidate genes identification and location, refer to Table S1. A = adenine; C = cytosine; G = guanine; T = thymine.

<sup>b</sup> Controlling for age, sex, smoking, diabetes mellitus, presence of ST elevation and reperfusion or revascularization.
